# Supplementary material
Source: Springer Nature journal article supplement (https://www.springermedizin.de/resource/supplementary/13014_2013_1262_MOESM1_ESM.pdf/9634518)

**(A) MCF-10A**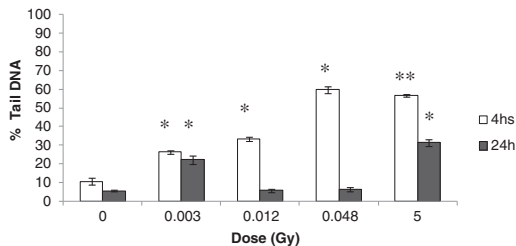**(B) MCF-7**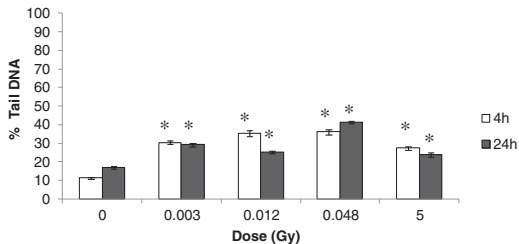**(C)**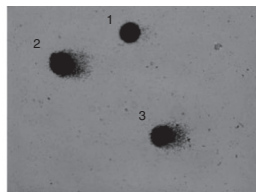**(D)**

| Cell line/incub. (h) | MCF-10A/ 4h |    |     |     |      | MCF-10A/ 24h |    |    |     |      | MCF-7/ 4h |   |     |     |      | MCF-7/ 24h |     |     |    |      |     |     |     |     |    |
|----------------------|-------------|----|-----|-----|------|--------------|----|----|-----|------|-----------|---|-----|-----|------|------------|-----|-----|----|------|-----|-----|-----|-----|----|
|                      | 0           | 1  | 2   | 3   | 4 DS | 0            | 1  | 2  | 3   | 4 DS | 0         | 1 | 2   | 3   | 4 DS | 0          | 1   | 2   | 3  | 4 DS |     |     |     |     |    |
| Dose (Gy)            | 0           | 90 | 8.7 | 1   | 0    | 0            | 11 | 95 | 4.8 | 0.4  | 0         | 0 | 5.6 | 89  | 10   | 0.7        | 0   | 0   | 11 | 84   | 16  | 0.7 | 0   | 0   | 17 |
|                      | 0.003       | 78 | 18  | 4.4 | 0    | 0            | 26 | 81 | 16  | 2.5  | 0.3       | 0 | 22  | 74  | 23   | 2.5        | 0.8 | 0   | 30 | 76   | 19  | 5   | 0.2 | 0   | 29 |
|                      | 0.012       | 72 | 23  | 4.2 | 0.3  | 0.3          | 33 | 94 | 5.7 | 0    | 0         | 0 | 5.7 | 69  | 27   | 3          | 0.7 | 0   | 35 | 80   | 16  | 4.2 | 0.3 | 0   | 25 |
|                      | 0.048       | 57 | 31  | 9.1 | 2.9  | 0.5          | 60 | 94 | 5.2 | 0.6  | 0         | 0 | 6.5 | 71  | 25   | 1.8        | 0.5 | 1.5 | 36 | 69   | 23  | 6.2 | 1.8 | 0.2 | 41 |
|                      | 5           | 57 | 30  | 13  | 0.5  | 0            | 57 | 83 | 9   | 3.7  | 2.3       | 2 | 31  | 3.2 | 5.2  | 4          | 1.8 | 2.2 | 27 | 4.6  | 4.8 | 4.4 | 1.2 | 1.7 | 24 |

Supplement: MOESM1 [file 9634518]
